# Supplementary material for: When Uncontrolled Diabetes Mellitus and Severe COVID-19 Converge: The Perfect Storm for Mucormycosis
Source: MDPI journal article supplement (doi:10.3390/jof7040298), 2021-04-14
Supplement: s1 [file s1]

|                                               | Patient 1                                                        | Patient 2                      | Patient 3                                 | Patient 4-8                                                      | Patient 9                             | Patient 10                                                    | Patient 11                                                                                 | Patient 12                                          | Patient 13                                                       | Patients 14-30                                                                                 | Patients 31-36                                    | Patient 37                                       | Patient 38                               | Patient 39                                                                                    | Patient 40                                                                                                                                          | Patient 41                                                                                                                 | Patient 42                                           | Patient 43                               |
|-----------------------------------------------|------------------------------------------------------------------|--------------------------------|-------------------------------------------|------------------------------------------------------------------|---------------------------------------|---------------------------------------------------------------|--------------------------------------------------------------------------------------------|-----------------------------------------------------|------------------------------------------------------------------|------------------------------------------------------------------------------------------------|---------------------------------------------------|--------------------------------------------------|------------------------------------------|-----------------------------------------------------------------------------------------------|-----------------------------------------------------------------------------------------------------------------------------------------------------|----------------------------------------------------------------------------------------------------------------------------|------------------------------------------------------|------------------------------------------|
| Author / year                                 | Placik etal. 2020 (1)                                            | Werthman-Ehrenreich. 2020 (2)  | Monte Junior etal. 2020 (3)               | Sen etal. 2021 (4)                                               | Mekonnen etal.2020 (5)                | Mehta etal. 2020 (6)                                          | Hanley etal. 2020 (7)                                                                      | Zurl etal. 2021 (8)                                 | Waizel-Haiat etal. 2021 (9)                                      | Moorthy etal. 2021 (10)                                                                        | Sarkar etal. 2021 (11)                            | Kanwar etal. 2021 (12)                           | Pauli etal. 2021 (13)                    | Dallalzadeh etal.2021 (14)                                                                    | Karimi-Galougahi et al.2021 (15)                                                                                                                    | Khatri A. etal. 2021 (16)                                                                                                  | Pasero etal. 2020 (17)                               | Garg etal., 2021 (18)                    |
| Country of reporting                          | USA                                                              | USA                            | Brazil                                    | India                                                            | USA                                   | India                                                         | UK                                                                                         | Austria                                             | Mexico                                                           | India                                                                                          | India                                             | USA                                              | Brazil                                   | USA                                                                                           | Iran                                                                                                                                                | USA                                                                                                                        | Italy                                                | India                                    |
| Sex                                           | Male                                                             | Female                         | Male                                      | Male (n=5)                                                       | Male                                  | Male                                                          | Male                                                                                       | Male                                                | Male                                                             | Male 15, Female 2                                                                              | Male 4, Female 2                                  | Male                                             | Female                                   | Male                                                                                          | Female                                                                                                                                              | Male                                                                                                                       | Male                                                 | Male                                     |
| Age (in years)                                | 49                                                               | 33                             | 86                                        | 58 (mean)                                                        | 60                                    | 60                                                            | 22                                                                                         | 53                                                  | 24                                                               | 54.8                                                                                           | 44                                                | 56                                               | 50                                       | 48                                                                                            | 61                                                                                                                                                  | 68                                                                                                                         | 66                                                   | 55                                       |
| Risk factors for severe Covid-19 <sup>i</sup> | None                                                             | DM, HTN, Asthma                | HTN                                       | DM (n=5), HTN (n=1), CAD (n=1)                                   | DM, Asthma, HTN                       | DM                                                            | Severe obesity (BMI 48.8)                                                                  | MDS, AML                                            | Obesity                                                          | DM (n=15)                                                                                      | DM (n=6)                                          | ESRD                                             | DM                                       | DM                                                                                            | DM                                                                                                                                                  | Heart transplant                                                                                                           | HTN (on ACE)                                         | DM, HTN, CAD, cardiomyopathy, ESRD       |
| EORTC risk factors                            | None                                                             | None                           | None                                      | None                                                             | None                                  | None                                                          | None                                                                                       | Yes, neutropenia                                    | None                                                             | None                                                                                           | NA                                                | None                                             | None                                     | None                                                                                          | NA                                                                                                                                                  | Yes                                                                                                                        | None                                                 | None                                     |
| Occupational exposure                         | NA                                                               | NA                             | NA                                        | NA                                                               | NA                                    | NA                                                            | NA                                                                                         | NA                                                  | NA                                                               | NA                                                                                             | NA                                                | NA                                               | NA                                       | NA                                                                                            | NA                                                                                                                                                  | NA                                                                                                                         | NA                                                   | NA                                       |
| Diabetes mellitus                             | No                                                               | Yes, new onset                 | No                                        | Yes (n=5), uncontrolled (n=3)                                    | Yes, uncontrolled                     | Yes                                                           | NA                                                                                         | NA                                                  | Yes, new onset                                                   | Yes, uncontrolled (n=15)                                                                       | Yes (n=6)                                         | NA                                               | Yes, uncontrolled                        | Yes                                                                                           | Yes, New Onset                                                                                                                                      | Yes                                                                                                                        | No                                                   | Yes, uncontrolled                        |
| HbA1C                                         | NA                                                               | NA                             | NA                                        | 8.8 (mean) (n=3)                                                 | 14                                    | NA                                                            | NA                                                                                         | NA                                                  | NA                                                               | NA                                                                                             | NA                                                | NA                                               | NA                                       | NA                                                                                            | NA                                                                                                                                                  | NA                                                                                                                         | NA                                                   | 5.3 (low due to anemia)                  |
| DKA on admission                              | NA                                                               | Yes                            | NA                                        | Yes (n=2)                                                        | Yes                                   | Yes                                                           | NA                                                                                         | NA                                                  | Yes                                                              | NA                                                                                             | Yes (n=2)                                         | NA                                               | No                                       | No                                                                                            | NA                                                                                                                                                  | No                                                                                                                         | No                                                   | No                                       |
| Initial X-ray/CT                              | Bilateral patchy opacities                                       | Left lower lobe consolidation  | Ground glass opacities with consolidation | Not available                                                    | ARDS                                  | Extensive peripheral ground glass and consolidative opacities | Bilateral air space consolidation                                                          | Bilateral peripheral ground glass opacities         | Peripheral ground-glass and consolidative opacities              | NA                                                                                             | NA                                                | NA                                               | NA                                       | ARDS                                                                                          | NA                                                                                                                                                  | central and peripheral ground glass opacities                                                                              | NA                                                   | Bilateral diffuse infiltrates            |
| X-ray/ CT (at the time of mucormycosis)       | Pneumothorax, bullae/cavity concerning for BPF, necrotic empyema | NA                             | NA                                        | Right cavernous sinus and fronto parietal lobe involvement (n=1) | NA                                    | NA                                                            | Hemorrhagic Right MCA infarct                                                              | Increase in bilateral infiltrates, pleural effusion | Striation of extra-conal fat in the face and peri-orbital region | NA                                                                                             | Sinusitis ± orbital ± intracranial involvement    | Bilateral air space density and pleural effusion | No significant alteration in the maxilla | MRI with Right sino-nasal cavity and anterior skull base extending to bilateral Frontal lobes | Complete Opacification of Right Maxillary Sinus and Anterior Ethmoidal air cells with internal foci of air that was representative of acute infarct | 6.4 x 5.3 cm fluid collection in anterior chest wall at previous IABP catheter site with subclavian artery pseudo-aneurysm | Dense consolidation, buried cavity, pleural effusion | Right upper zone cavity                  |
| Sinus involvement                             | NA                                                               | Yes                            | NA                                        | Yes (n=5), and Sino-cutaneous fistula (n=1)                      | Yes, pan sinusitis                    | Yes, pan sinusitis                                            | NA                                                                                         | NA                                                  | Yes (maxillary, ethmoid and sphenoid)                            | Yes (n=17)                                                                                     | Yes (n=6)                                         | NA                                               | NA                                       | Right sinonasal cavity                                                                        | Yes(Maxillary and Ethmoidal)                                                                                                                        | No                                                                                                                         | Yes                                                  | NA                                       |
| Covid severity <sup>ii</sup>                  | Severe (5 L O2, involvement of > 50% lung)                       | Severe (ICU)                   | Critical (mechanical ventilation) (ICU)   | Severe (n=4), NA =1                                              | Critical (mechanical ventilation) ICU | Severe (ICU)                                                  | Critical (mechanical ventilation, vaso pressors) (ICU)                                     | Critical (NIV) ICU                                  | Critical (ICU)                                                   | NA                                                                                             | Critical (n=6)                                    | Severe                                           | Mild                                     | Critical (ICU)                                                                                | NA                                                                                                                                                  | Critical                                                                                                                   | Critical (mechanical ventilation)                    | Severe                                   |
| Covid-19 specific therapy                     | Remdesivir                                                       | Remdesivir, CCP                | Oseltamivir, Azithromycin                 | NA (n=5)                                                         | CCP                                   |                                                               | NA                                                                                         | NA                                                  | NA                                                               | NA                                                                                             | Remdesivir (n=2)                                  | CCP                                              | No                                       | CCP                                                                                           | Remdesivir, Interferon alpha                                                                                                                        | CCP                                                                                                                        | HCQS, Lopinavir-ritonavir                            | Remdesivir                               |
| Systemic steroids, duration (if available)    | Dexamethasone                                                    | No                             | Hydrocortisone                            | Methylprednisolone/Prednisone/Dexamethasone (n=5)                | Dexamethasone                         | Methylprednisolone/Dexamethasone                              | NA                                                                                         | Prednisolone (high dose)                            | NA                                                               | Yes (n=17)                                                                                     | Steroids (n=6)                                    | Methyl prednisone                                | No                                       | Dexamethasone                                                                                 | Yes                                                                                                                                                 | Methylprednisolone/ Prednisone (for gout)                                                                                  | No                                                   | Dexamethasone x 14 days                  |
| Other therapies                               | Tocilizumab                                                      | No                             | No                                        | NA                                                               | No                                    | Tocilizumab                                                   | NA                                                                                         | Tocilizumab                                         | NA                                                               | NA                                                                                             | NA                                                | Tocilizumab                                      | No                                       | NA                                                                                            | NA                                                                                                                                                  | No                                                                                                                         | No                                                   | No                                       |
| Renal failure                                 | NA                                                               | Yes                            | Yes                                       | NA                                                               | No                                    | Yes                                                           | Yes                                                                                        | NA                                                  | Yes                                                              | NA                                                                                             | NA                                                | Yes                                              | No                                       | NA                                                                                            | NA                                                                                                                                                  | Yes                                                                                                                        | Yes                                                  | Yes                                      |
| Renal replacement therapy                     | None                                                             | No                             | No                                        | NA                                                               | No                                    | No                                                            | NA                                                                                         |                                                     | NA                                                               | NA                                                                                             | NA                                                | Yes (present on admission)                       | No                                       | NA                                                                                            | NA                                                                                                                                                  | No                                                                                                                         | Yes                                                  | Yes (present on admission)               |
| Vasopressors                                  | None                                                             | No                             | Yes                                       | NA                                                               | No                                    | No                                                            | Yes                                                                                        | Yes                                                 | NA                                                               | NA                                                                                             | NA                                                | NA                                               | No                                       | NA                                                                                            | NA                                                                                                                                                  | No                                                                                                                         | Yes                                                  | No                                       |
| Time from Covid-19 to mucormycosis (in days)  | 14                                                               | Concurrent                     | Concurrent                                | Concurrent (n=1), Sequential (n=4)                               | 7                                     | 10                                                            | Concurrent                                                                                 | Concurrent                                          | Concurrent                                                       | Concurrent (n=4)                                                                               | Concurrent (n=6)                                  | 16                                               | 8                                        | 6                                                                                             | 21                                                                                                                                                  | 90                                                                                                                         | 17                                                   | 17                                       |
| Clinical syndrome                             | Necrotizing pneumonia with bronchopleural fistula                | Rhino-orbital-cerebral disease | Gastric mucor                             | Rhino-orbital-cerebral                                           | Rhino-orbital                         | Rhino-orbital                                                 | Disseminated (lungs, hilar lymph nodes, heart - fibrinous pericarditis, brain and kidneys) | Fungal pneumonia with effusion                      | Rhino-orbital                                                    | Sinusitis alone (n=3), Rhino-orbital (n=6), Rhino-orbital-cerebral (n=5), Rhino-cerebral (n=3) | Rhino-orbital (n=5), Rhino-orbital-cerebral (n=1) | Necrotizing pneumonia with empyema               | Palatal ulcer                            | Rhino-orbital                                                                                 | Rhino- orbital                                                                                                                                      | Cutaneous                                                                                                                  | Cavitary pneumonia with pleural effusion             | Cavitary pneumonia with pleural effusion |
| Clinical specimen                             | Necrotic lung                                                    | Sinus tissue                   | Gastric biopsy                            | Orbital (n=4) and sinus tissue (n=5)                             | Sinus tissue                          | Sinus tissue                                                  | Full autopsy                                                                               | Full autopsy                                        | Sinus sample                                                     | Sinus tissue                                                                                   | Sinus tissue                                      | Lung tissue                                      | Palate tissue                            | Pus culture                                                                                   | Sinus tissue                                                                                                                                        | Tissue debridement                                                                                                         | BAL                                                  | Sputum culture                           |

|                                           |                    |                       |                       |                                                  |                                           |                           |                                  |                                                                             |                                                           |                                                       |                                          |                       |                       |                    |                                                           |                                                                               |                                           |                                                                         |
|-------------------------------------------|--------------------|-----------------------|-----------------------|--------------------------------------------------|-------------------------------------------|---------------------------|----------------------------------|-----------------------------------------------------------------------------|-----------------------------------------------------------|-------------------------------------------------------|------------------------------------------|-----------------------|-----------------------|--------------------|-----------------------------------------------------------|-------------------------------------------------------------------------------|-------------------------------------------|-------------------------------------------------------------------------|
| Fungal markers                            | NA                 | NA                    | NA                    | NA                                               | NA                                        | NA                        | NA                               | Serum beta-d-glucan 178 pg/mL, Serum <i>Aspergillus</i> GM antigen negative | NA                                                        | NA                                                    | NA                                       | NA                    | NA                    | NA                 | NA                                                        | Serum beta-d-glucan 43 pg/mL, Serum <i>Aspergillus</i> GM antigen index < 0.5 | NA                                        | Serum beta-d-glucan 189 pg/mL, Serum <i>Aspergillus</i> GM antigen 0.18 |
| Neutropenia                               | NA                 | Absent (22,000)       | Absent (11,200)       | NA                                               | NA                                        | NA                        | Absent                           | Yes (ANC < 500)                                                             | Absent                                                    | NA                                                    | NA                                       | Absent                | NA                    | NA                 | NA                                                        | Absent                                                                        | Absent (10,300)                           | Absent                                                                  |
| Lymphopenia ( TLC<1000/micr oL)           | NA                 | 1370                  | 580                   | NA                                               | NA                                        | Mild (value not reported) | NA                               | 100                                                                         | NA                                                        | NA                                                    | NA                                       | Yes (582)             | NA                    | NA                 | NA                                                        | NA                                                                            | NA                                        | NA                                                                      |
| Microbiological diagnosis                 |                    |                       |                       |                                                  |                                           |                           |                                  |                                                                             |                                                           |                                                       |                                          |                       |                       |                    |                                                           |                                                                               |                                           |                                                                         |
| - stain                                   | Yes                | Yes                   | Yes                   | Yes (n=5)                                        | Yes                                       | Yes                       | Yes                              | Yes                                                                         | Yes                                                       | Yes                                                   | Yes                                      | Yes                   | Yes                   | Yes                | Yes                                                       | NA                                                                            | Yes                                       | Yes                                                                     |
| - PCR                                     | NA                 | NA                    | NA                    | NA                                               | NA                                        | NA                        | Yes                              | NA                                                                          | NA                                                        | NA                                                    | NA                                       | NA                    | NA                    | NA                 | NA                                                        | NA                                                                            | NA                                        | Not done                                                                |
| - sequencing                              | NA                 | NA                    | NA                    | NA                                               | NA                                        | NA                        | Yes                              | Yes                                                                         | NA                                                        | NA                                                    | NA                                       | NA                    | NA                    | NA                 | NA                                                        | NA                                                                            | NA                                        | Not done                                                                |
| - culture                                 | Yes                | Yes                   | NA                    | No                                               | Yes                                       | Yes                       | Not reported                     | NA                                                                          | Yes                                                       | NA                                                    | Yes                                      | Yes                   | No                    | Yes                | NA                                                        | Yes                                                                           | Yes (rapidly growing cotton-candy colony) | Yes                                                                     |
| Histopathological diagnosis               | Yes                | NA                    | Yes                   | Yes                                              | Yes                                       | Yes                       | Yes                              | Yes                                                                         | No                                                        | Yes                                                   | NA                                       | Yes                   | Yes                   | No                 | Yes                                                       | Yes                                                                           | Negative                                  | No                                                                      |
| Genera                                    | Rhizopus sp.       | Mucorale, unspecified | Mucorale, unspecified | Mucorale, unspecified (n=5)                      | Rhizopus                                  | Mucorale, unspecified     | Mucorale, unspecified            | Rhizopus microsporus                                                        | Lichteimia (Absidia) spp.                                 | Mucorale, unspecified                                 | Rhizopus (n=4), Mucor (n=2)              | Rhizopus azygosporus  | Mucorale, unspecified | Rhizopus spp.      | Mucorale , Unspecified                                    | Rhizopus microsporus                                                          | Rhizopus sp.                              | Rhizopus microsporus                                                    |
| Disease classification <sup>iii</sup>     | Documented, Proven | Documented, Proven    | Documented, Proven    | Documented, Proven (n=5)                         | Documented, Proven                        | Documented, Proven        | Documented, Proven (post-mortem) | Documented, Proven (post mortem)                                            | Documented, Probable                                      | Documented, Proven (n=17)                             | Documented, Proven (n=4), Probable (n=2) | Documented, Proven    | Documented, Proven    | Documented, Proven | Documented, Proven                                        | Documented, Proven                                                            | Putative                                  | Putative                                                                |
| Co-infection (including CMV reactivation) | Not reported       | Staphylococcus aureus | None                  | Pseudomonas (n=1), Aspergillus (n=1)             | None                                      | Not available             | Not reported                     | NA                                                                          | No                                                        | Aspergillus (n=1)                                     | NA                                       | No                    | No                    | No                 | No                                                        | No                                                                            | Not reported                              | No                                                                      |
| Co-colonization                           | No                 |                       | None                  | None                                             | None                                      | None                      | Not reported                     | NA                                                                          | <i>K.pneumoniae</i> , <i>E.cloacae</i> , <i>E.fecalis</i> | NA                                                    | NA                                       | No                    | No                    | No                 | No                                                        | No                                                                            | Candida glabrata on siuns sample          | No                                                                      |
| Anti-fungal therapy                       | AM-B               | AM-B                  | None                  | Liposomal AM-B + voriconazole/Posaconazole (n=5) | Liposomal AM-B+ caspofungin /Posaconazole | Amphotericin B            | None                             | None                                                                        | Amphotericin B                                            | Amphotericin B                                        | Amphotericin B                           | Amphotericin B        | Amphotericin B        | AMB/Isuvaconazole  | Systemic antifungals (Unspecified)                        | AM-B + Posaconazole                                                           | AM-B/ Isavuconazole                       | Amphotericin B                                                          |
| Adjunct surgery                           | Resection          | Sinus debridement     | None                  | Exenteration (n=2), sinus debridement (n=3)      | Sinus debridement                         | None                      | NA                               | NA                                                                          | None                                                      | FESS (n=17), Maxillectomy (n=11), Exenteration (n=11) | Maxillectomy (n=3), FESS (n=1)           | Robotic decortication | Debridement           | None               | Endonasal Endoscopic Debridement + Right eye exenteration | Thoracic cavity debridement                                                   | None                                      | None                                                                    |
| Outcome                                   | Died (day 21)      | Died (day 26)         | Died (7 days)         | Survived (n=5)                                   | Died (day 31)                             | Died (day 16)             | Died (day 27)                    | Died (day 24)                                                               | Died                                                      | Died (n=6)                                            | Died (n=3)                               | Died (day 33)         | Survived              | Died               | Survived                                                  | Died                                                                          | Died (day 62)                             | Survived                                                                |
| Time of death after MCR diagnosis (days)  | 5                  | 26                    | 2                     |                                                  | 29                                        | 6                         | Not applicable                   | Not applicable                                                              | NA                                                        | NA                                                    | NA                                       | 17                    |                       | NA                 | NA                                                        | NA                                                                            | 45                                        |                                                                         |

Abbreviations: NA, not available; EORTC, European Organization for Research and Treatment of Cancer; DM, diabetes mellitus; DKA, diabetic ketoacidosis; HTN, hypertension; CAD, coronary artery disease; BMI, body mass index; MDS, myelodysplastic syndrome; AML, acute myeloid leukemia; MCR, mucormycosis; HbA1C, hemoglobin A1C; CT, computerized tomography; ARDS, acute respiratory distress syndrome; NIV, non-invasive ventilation; BPF, broncho-pleural fistula; MCA, middle cerebral artery; ICU, intensive care unit; CCP, COVID-19 convalescent plasma; AM-B, amphotericin B.

<sup>i</sup> Risk factors for severe Covid-19 include cardiovascular disease including coronary artery disease (CAD), diabetes mellitus (DM), hypertension (HTN), chronic lung disease including asthma, chronic kidney disease, cancer, obesity and smoking

<sup>ii</sup> Covid severity - Mild: no pneumonia or mild pneumonia (lung infiltrates < 50%), Severe: dyspnea, respiratory rate ≥ 30 / min, blood oxygen saturation ≤ 93 %, PaO2 / FiO2 < 300 and/ or lung infiltrates > 50 % within 24-48 hours, Critical: respiratory failure, septic shock and/or multi-organ dysfunction

<sup>iii</sup> Proven - if histopathologic, cytopathologic or direct microscopic examination of a specimen obtained by obtained by needle aspiration or biopsy in which hyphae or melanized yeast-like forms are seen accompanied by evidence of associated tissue damage OR Recovery of a hyaline or pigmented mold by culture of a specimen obtained by a sterile procedure from a normally sterile and clinically or radiologically abnormal site consistent with an infectious disease process, excluding BAL fluid, a paranasal or mastoid sinus cavity specimen, and urine OR Blood culture that yields a mold (eg, Fusarium species) in the context of a compatible infectious disease process OR Amplification of fungal DNA by PCR combined with DNA sequencing when molds are seen in formalin-fixed paraffin-embedded tissue, Putative - if none of the criteria are met but Mucor is attributed as a pathogen and patient was treated for it.

- Placik DA, Taylor WL, Wnuk NM. Bronchopleural fistula development in the setting of novel therapies for acute respiratory distress syndrome in SARS-CoV-2 pneumonia. Radiol Case Rep. 2020;15(11):2378-81.
- Werthman-Ehrenreich A. Mucormycosis with orbital compartment syndrome in a patient with COVID-19. Am J Emerg Med. 2020.
- Monte Junior ESD, Santos M, Ribeiro IB, Luz GO, Baba ER, Hirsch BS, et al. Rare and Fatal Gastrointestinal Mucormycosis (Zygomycosis) in a COVID-19 Patient: A Case Report. Clin Endosc. 2020;53(6):746-9.
- Sen M, Lahane S, Lahane TP, Parekh R, Honavar SG. Mucor in a Viral Land: A Tale of Two Pathogens. Indian J Ophthalmol. 2021;69(2):244-52.
- Mekonnen ZK, Ashraf DC, Jankowski T, Grob SR, Vagefi MR, Kersten RC, et al. Acute Invasive Rhino-Orbital Mucormycosis in a Patient With COVID-19-Associated Acute Respiratory Distress Syndrome. Ophthalmic Plast Reconstr Surg. 2020.
- Mehta S, Pandey A. Rhino-Orbital Mucormycosis Associated With COVID-19. Cureus. 2020;12(9):e10726.
- Hanley B, Naresh KN, Roufousse C, Nicholson AG, Weir J, Cooke GS, et al. Histopathological findings and viral tropism in UK patients with severe fatal COVID-19: a post-mortem study. The Lancet Microbe. 2020;1(6):e245-e53.
- Zurl C, Hoenigl M, Schulz E, Hatzl S, Gorkiewicz G, Krause R, et al. Autopsy Proven Pulmonary Mucormycosis Due to Rhizopus microsporus in a Critically Ill COVID-19 Patient with Underlying Hematological Malignancy. J Fungi (Basel). 2021;7(2).
- Waizel-Haiat S, Guerrero-Paz JA, Sanchez-Hurtado L, Calleja-Alarcon S, Romero-Gutierrez L. A Case of Fatal Rhino-Orbital Mucormycosis Associated With New Onset Diabetic Ketoacidosis and COVID-19. Cureus. 2021;13(2):e13163.
- Moorthy A, Gaikwad R, Krishna S, Hegde R, Tripathi KK, Kale PG, et al. SARS-CoV-2, Uncontrolled Diabetes and Corticosteroids-An Unholy Trinity in Invasive Fungal Infections of the Maxillofacial Region? A Retrospective, Multi-centric Analysis. J Maxillofac Oral Surg. 2021:1-8.
- Sarkar S, Gokhale T, Choudhury SS, Deb AK. COVID-19 and orbital mucormycosis. Indian J Ophthalmol. 2021;69(4):1002-4.
- Kanwar A, Jordan A, Olewiler S, Wehberg K, Cortes M, Jackson BR. A Fatal Case of Rhizopus azygosporus Pneumonia Following COVID-19. J Fungi (Basel). 2021;7(3).
- Pauli MA, Pereira LdM, Monteiro ML, de Camargo AR, Rabelo GD. Painful palatal lesion in a COVID-19 patient. Oral Surgery, Oral Medicine, Oral Pathology and Oral Radiology. 2021.
- Dallalzadeh LO, Ozzello DJ, Liu CY, Kikkawa DO, Korn BS. Secondary infection with rhino-orbital cerebral mucormycosis associated with COVID-19. Orbit. 2021:1-4.
- Karimi-Galougahi M, Arastou S, Haseli S. Fulminant mucormycosis complicating coronavirus disease 2019 (COVID-19). Int Forum Allergy Rhinol. 2021.
- Khatri A, Chang K-M, Berlinrut I, Wallach F. Mucormycosis after Coronavirns disease 2019 infection in a heart transplant recipient – case report and review of literature. Journal of Medical Mycology. 2021.
- Pasero D, Sanna S, Liperi C, Piredda D, Branca GP, Casadio L, et al. A challenging complication following SARS-CoV-2 infection: a case of pulmonary mucormycosis. Infection. 2020.
